# Supplementary material for: Analysis of Individuals from a Dengue-Endemic Region Helps Define the Footprint and Repertoire of Antibodies Targeting Dengue Virus 3 Type-Specific Epitopes
Source: PubMed Central journal article supplement (PMC5605938; doi:10.1128/mbio.01205-17), 2017-09-19

### Supplemental Figure S3

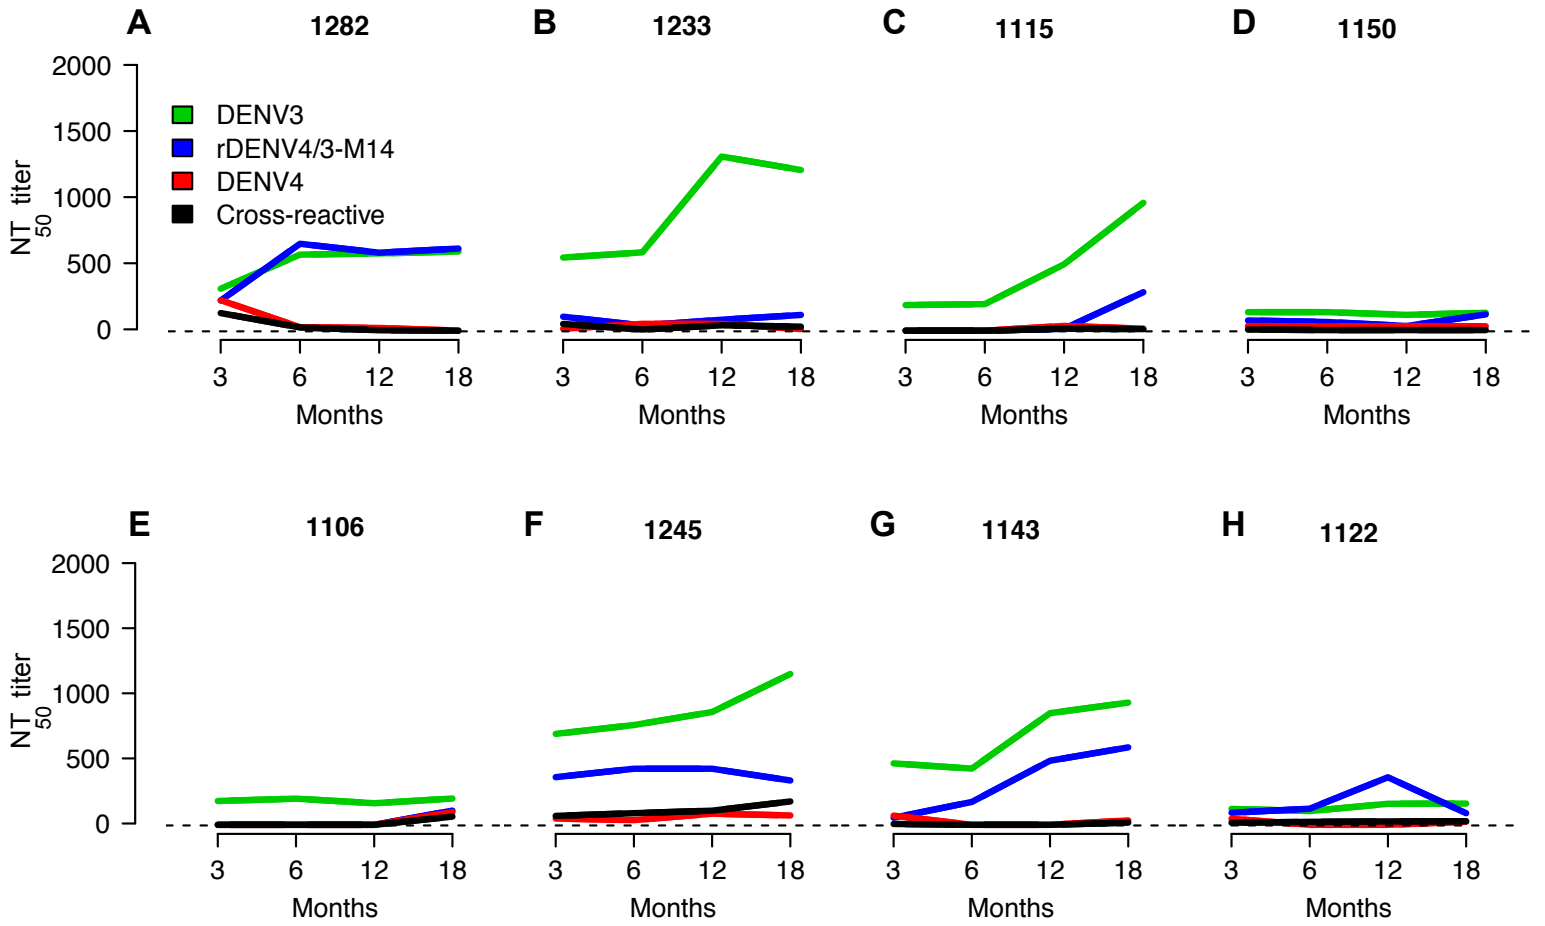

Supplement: mbo004173490sf3.pdf [file mbo004173490sf3.pdf]
